# Supplementary material for: A Schiff base sensor for relay monitoring of In3+ and Fe3+ through “off–on–off” fluorescent signals
Source: Royal Society of Chemistry journal article supplement (doi:10.1039/d1nj00929j), 2021-01-01
Supplement: d1nj00929j1.pdf [file d1nj00929j1.pdf]

## Supporting information

A Schiff base sensor for relay monitoring  $\text{In}^{3+}$  and  $\text{Fe}^{3+}$  through an “off-on-off” fluorescence signals

Bing Li, <sup>a</sup> Zhihua Liu, <sup>\*,b</sup> Linlin Li, <sup>a</sup> Yujing Xing, <sup>a</sup> Yuanying Liu, <sup>a</sup> Xiaofeng Yang, <sup>a</sup> Meishan Pei, <sup>a</sup> Guangyou Zhang <sup>\*,a</sup>

<sup>a</sup> *School of Chemistry and Chemical Engineering, University of Jinan, Jinan 250022, China. Email address: chm\_zhanggy@ujn.edu.cn.*

<sup>b</sup> *Henan Sanmenxia Aoke Chemical Industry Co. Ltd., Sanmenxia 472000, China. E-mail address: liuzhihua7059198@163.com*

*\* Corresponding author: Guangyou Zhang, E-mail address: chm\_zhanggy@ujn.edu.cn. Zhihua Liu, E-mail address: liuzhihua7059198@163.com*

## Experimental section

### Materials

All metal salts such as  $\text{MgCl}_2$ ,  $\text{CaCl}_2$ ,  $\text{CuCl}_2 \cdot 2\text{H}_2\text{O}$ ,  $\text{NiCl}_2 \cdot 6\text{H}_2\text{O}$ ,  $\text{FeCl}_2 \cdot 3\text{H}_2\text{O}$ ,  $\text{AlCl}_3 \cdot 6\text{H}_2\text{O}$ ,  $\text{AgCl}$ ,  $\text{CdCl}_2 \cdot 2.5\text{H}_2\text{O}$ ,  $\text{FeCl}_3 \cdot 6\text{H}_2\text{O}$ ,  $\text{CoCl}_2 \cdot 6\text{H}_2\text{O}$ ,  $\text{CrCl}_3 \cdot 6\text{H}_2\text{O}$ ,  $\text{InCl}_3$ ,  $\text{MnCl}_2 \cdot 4\text{H}_2\text{O}$ ,  $\text{KCl}$ ,  $\text{ZnCl}_2$ ,  $\text{HgCl}_2$ ,  $\text{LiCl}$  and  $\text{Ga}(\text{NO}_3)_3$  were analytical grade and used without further purification.

All other organic reagents were purchased and used as received.

### Instruments

UV-vis spectra were recorded through a Shimadzu 3100 spectrometer.

Fluorescence measurements were carried out using an Edinburgh

Instruments Ltd-FLS920 fluorescence spectrophotometer Fluorescence measurements were performed when excitation at 410 nm. The slits of excitation and emission were 10 nm and 20 nm, respectively. <sup>1</sup>H NMR spectra were executed with a Bruker AV III 400 MHz NMR spectrometer with tetramethylsilane (TMS) as an internal standard. <sup>13</sup>C NMR spectral data were obtained using a Bruker AV III 100 MHz NMR spectrometer with tetramethylsilane (TMS) as the internal standard and DMSO as the solvent. Infrared spectral data were obtained using a Bruker Vertex 70 FT-IR spectrometer and samples as KBr pellets.

### Sample preparation

All tests involved in this work were carried out with distilled water at room temperature (25 °C). In the experiments of titration with various metal ions, the sensor was dissolved in Tris DMF – H<sub>2</sub>O (9 : 1, v/v) buffer solution to afford the test solution (1 × 10<sup>-5</sup> M). Stock solutions (1 × 10<sup>-5</sup> M) of KCl, AlCl<sub>3</sub>, MgCl<sub>2</sub>, CaCl<sub>2</sub>, LiCl, FeCl<sub>2</sub>, HgCl<sub>2</sub>, NiCl<sub>2</sub>, CuCl<sub>2</sub>, ZnCl<sub>2</sub>, AgCl, MnCl<sub>2</sub>, FeCl<sub>3</sub>, CoCl<sub>2</sub>, CrCl<sub>3</sub>, CdCl<sub>2</sub>, InCl<sub>3</sub>, Ga(NO<sub>3</sub>)<sub>3</sub> were prepared at a concentration of 0.03 M with distilled water.

### Calculation of quantum yield

The quantum yield of **LB2**, [**LB2**+In<sup>3+</sup>] and [**LB2**+Fe<sup>3+</sup>] were determined according to the following equation:

$$\phi_u = \phi_s \frac{F_u A_s n_u^2}{F_s A_u n_s^2}$$

where  $\phi$  is quantum yield;  $F$  is integrated area under the corrected emission

spectra;  $A$  is the absorbance at the excitation wavelength;  $n$  is the refractive index of the solution; the subscripts  $u$  and  $s$  refer to the unknown and the standard, fluorescence respectively. Rhodamine B in ethanol solution was used as the standard, which has a quantum yield of 0.97.<sup>59</sup>

### Theoretical calculation

Density functional theory (DFT) structural optimizations were performed on the Gaussian 09 program. In all conditions, the structures were optimized via the B3LYP functional and the mixed basis sets 6-31G(d) and LANL2DZ. Each structure was subsequently subjected to TD-DFT calculation using the B3LYP functional soon afterwards. The absence of imaginary frequencies for all the optimized structures were confirmed through executing the frequency calculations. The molecular orbitals were visualized and plotted with the GaussView 09 program.<sup>60</sup>

### Synthesis of **LB2**

Compound **methyl 4,5-dihydronaphtho[1,2-*b*]thiophene-2-carboxylate(1)** and **4,5-dihydronaphtho[1,2-*b*]thiophene-2-carbohydrazide(2)** was synthesized according to the previous work.<sup>61-62</sup>

**Synthesize of *N'*-(3-ethoxy-2-hydroxybenzylidene)-4,5-dihydronaphtho[1,2-*b*]thiophene-2-carbohydrazide (LB2)**

Compound **2** (25 mg, 0.1 mmol) and 3-ethoxy-2-hydroxybenzaldehyde (20 mg, 0.12 mmol) was mixed in ethanol (2 ml). The mixture was then stirred at room temperature overnight. The precipitate was filtered and washed

with ethanol to afford the target product (white solid). Yield: 25 mg, 64.9%.  
ESI-MS:  $m/z = 393.1388$   $[M + H]^+$ . FTIR (KBr,  $\text{cm}^{-1}$ ): 3128(N-H),  
1400(C=N).  $^1\text{H}$  NMR (400 MHz, DMSO)  $\delta$  11.93 (d,  $J = 142.8$  Hz, 0H),  
9.93 (d,  $J = 655.0$  Hz, 0H), 8.57 (d,  $J = 51.2$  Hz, 0H), 7.87 (d,  $J = 40.6$  Hz,  
1H), 7.47 (d,  $J = 5.9$  Hz, 1H), 7.30 (dd,  $J = 13.8, 6.3$  Hz, 1H), 7.17 (d,  $J =$   
7.3 Hz, 0H), 7.03 (d,  $J = 7.8$  Hz, 0H), 6.86 (d,  $J = 7.6$  Hz, 1H), 4.08 (d,  $J =$   
6.6 Hz, 1H), 2.95 (d,  $J = 6.8$  Hz, 1H), 2.85 (t,  $J = 7.3$  Hz, 2H), 1.37 (t,  $J =$   
6.7 Hz, 1H).

|               |               |             |        |                 |              |                        |                       |
|---------------|---------------|-------------|--------|-----------------|--------------|------------------------|-----------------------|
| Sample Name   | 200710-LB-2   | Position    | P1-C6  | Instrument Name | Instrument 1 | User Name              |                       |
| Inj Vol       | -1            | InjPosition |        | SampleType      | Sample       | IRM Calibration Status | Success               |
| Data Filename | 200710-LB-2.d | ACQ Method  | 0103.m | Comment         |              | Acquired Time          | 7/10/2020 11:12:14 AM |

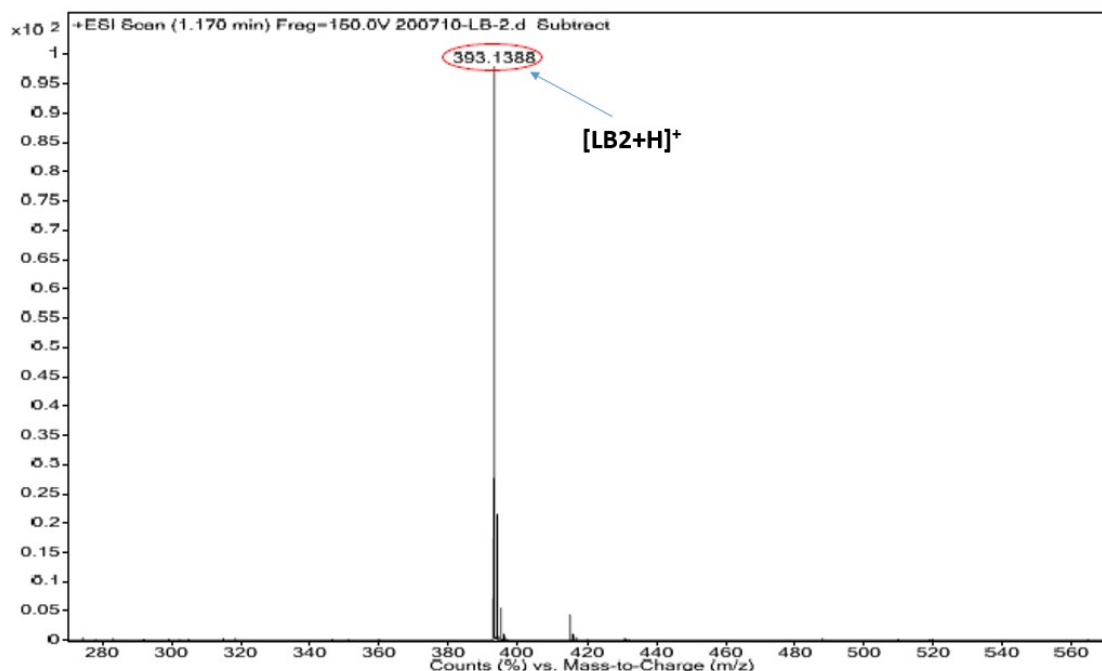

Fig.S1 ESI mass spectrum of probe **LB2**.

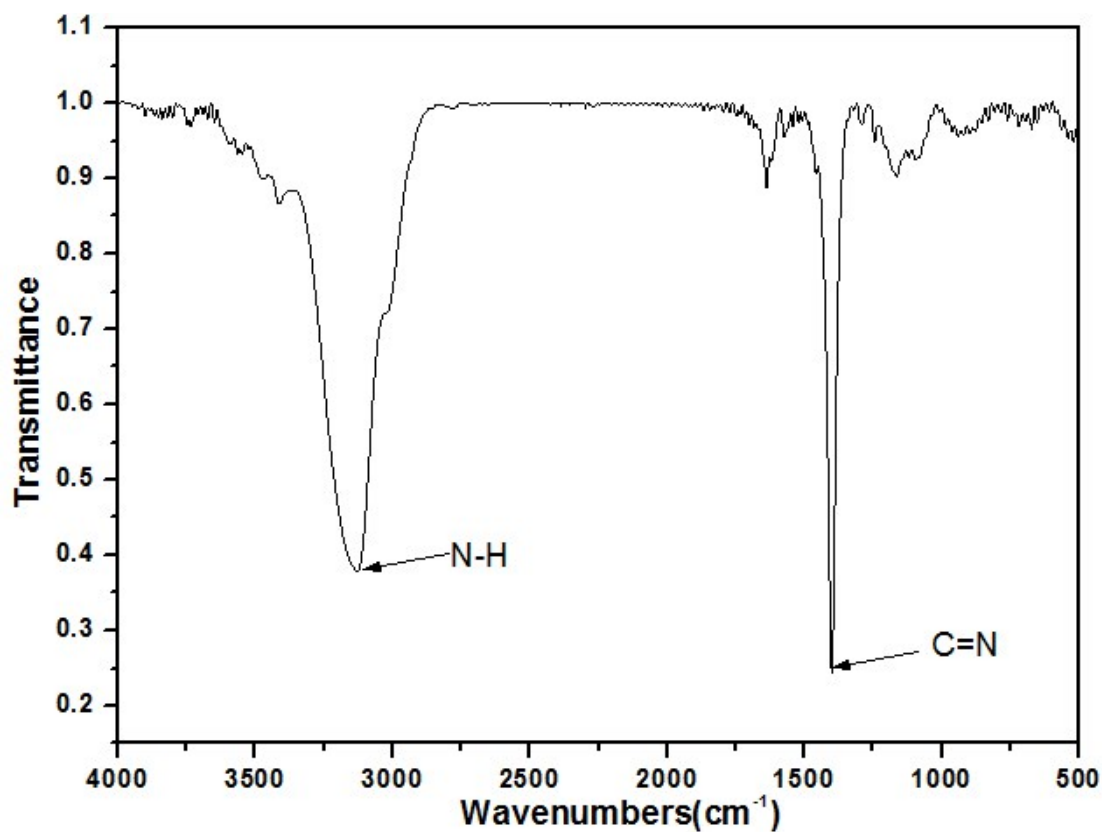

Fig.S2 The FTIR spectra of **LB2**

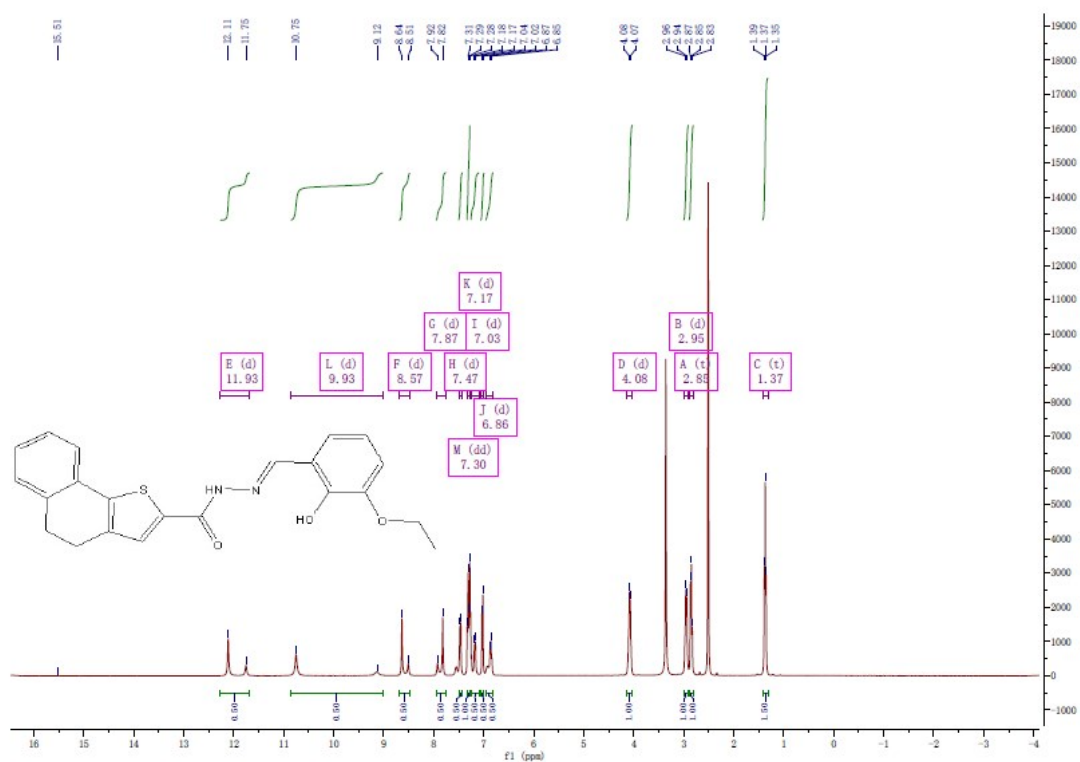

Fig.S3 <sup>1</sup>H NMR spectrum of compound **LB2**.

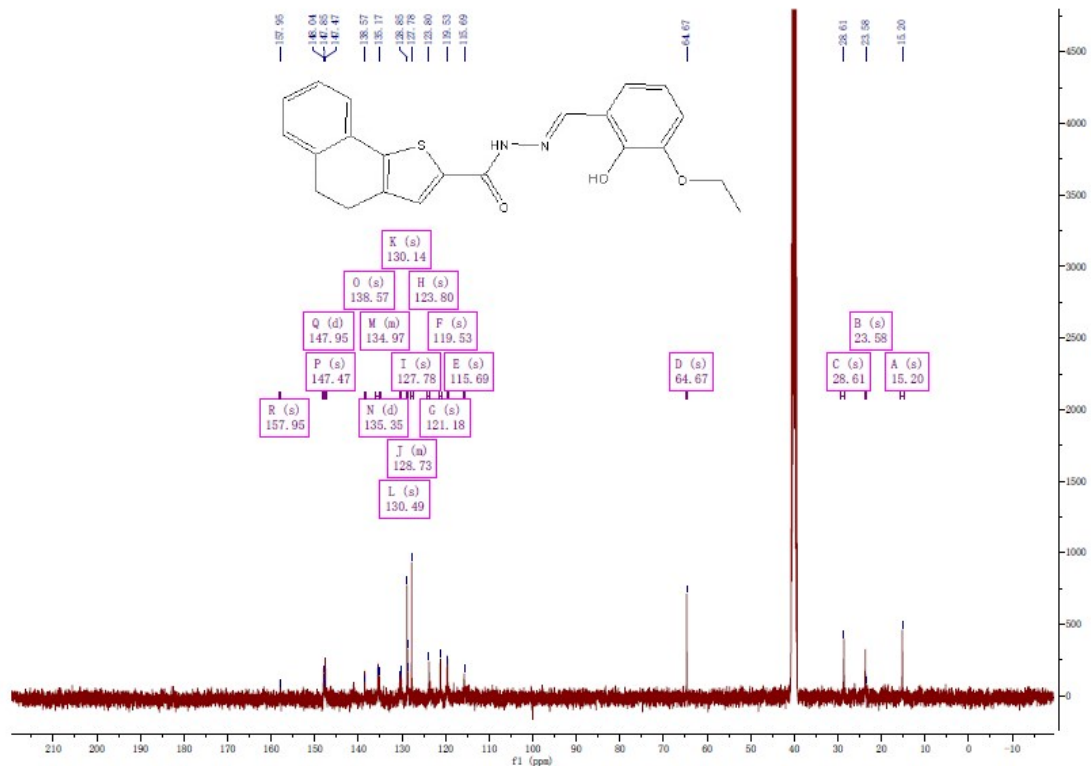

Fig.S4  $^{13}\text{C}$  NMR spectrum of compound **LB2**.

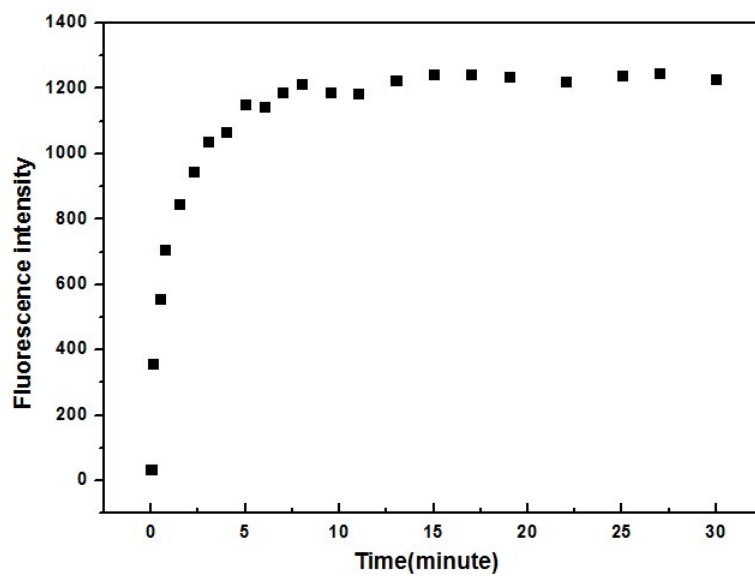

Fig.S5 Time dependent fluorescence response of **LB2** ( $30\ \mu\text{M}$ ) at  $\lambda=516\text{nm}$  in the presence of  $\text{In}^{3+}$  (3 eq.) in  $\text{DMF-H}_2\text{O}$  (9:1, v:v) 10 mM of Tris buffer solution at pH 7.4.  $\lambda_{\text{ex}} = 410\ \text{nm}$

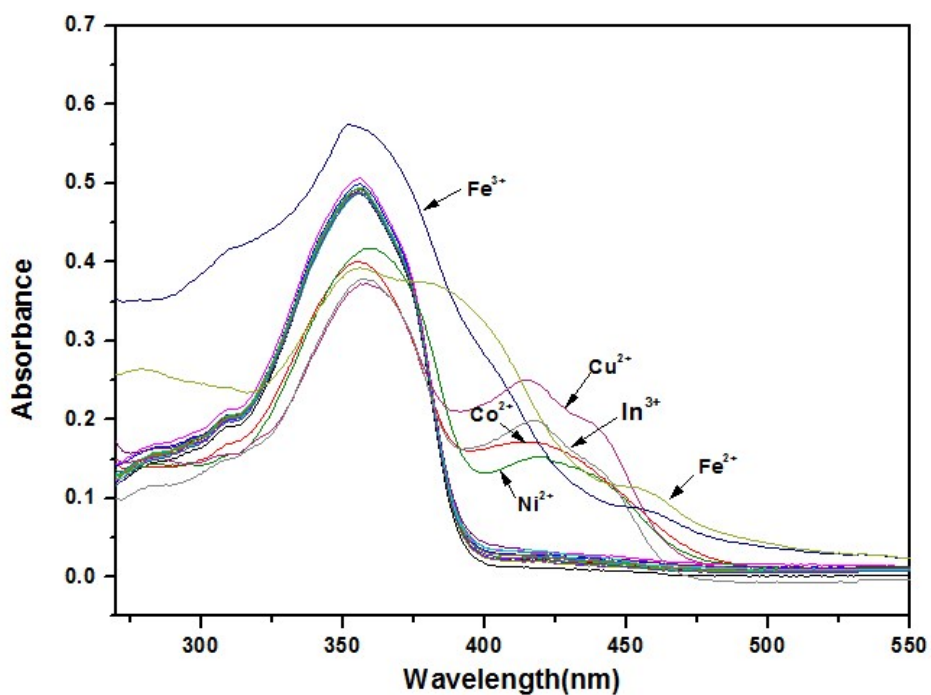

Fig.S6 Changes in absorption spectroscopy of **LB2** (30  $\mu\text{M}$ ) with different ions (30  $\mu\text{M}$ ) in DMF- $\text{H}_2\text{O}$  (9:1, v:v) 10 mM of Tris buffer solution at pH 7.4.

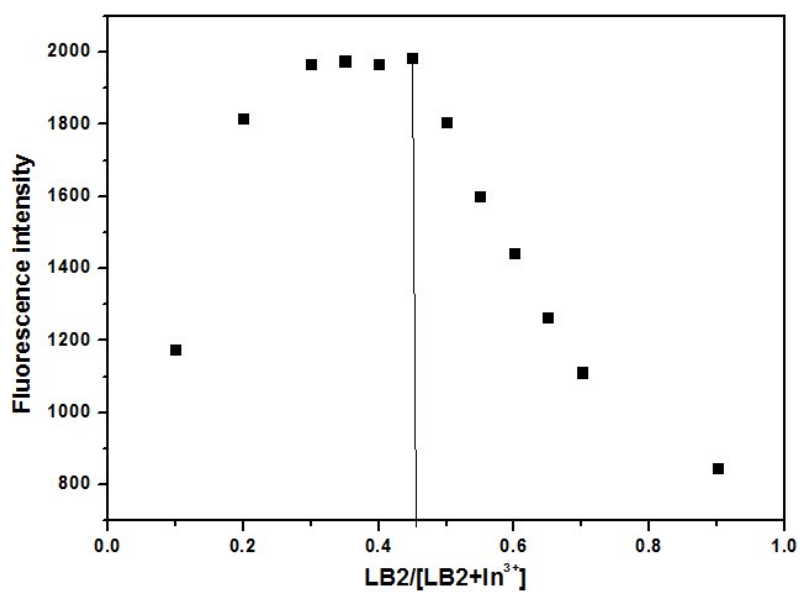

Fig.S7 Job's plot of the **LB2** in DMF- $\text{H}_2\text{O}$  (9 : 1, Tris 0.01 M, pH=7.4) at 25  $^{\circ}\text{C}$ . The total concentration of **LB2** and  $\text{In}^{3+}$  was 0.05 mM. Excitation is at 410 nm, and emission is monitored at 516 nm.

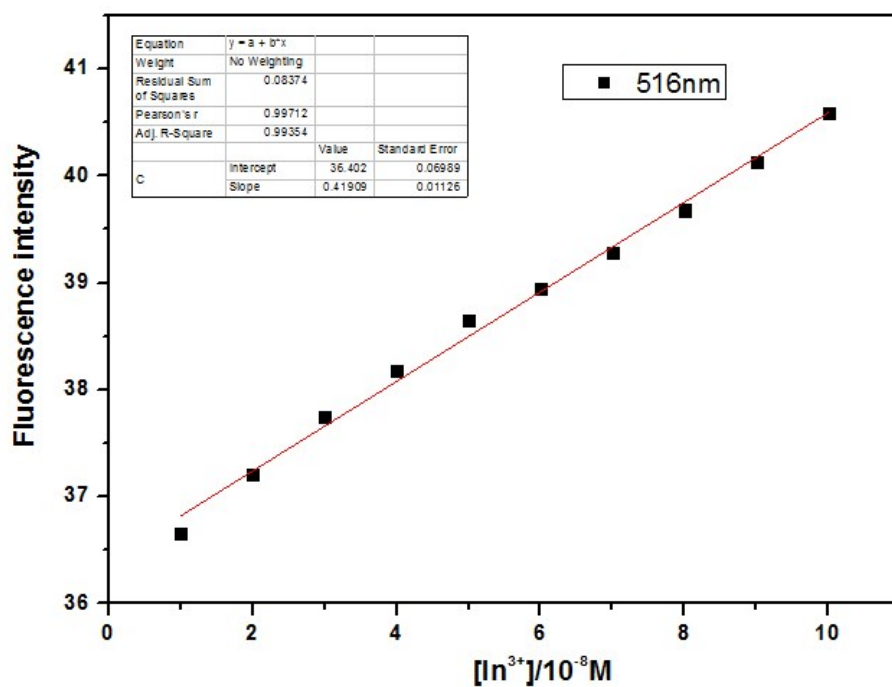

Fig.S8 Fluorescence intensity of **LB2** at 516 nm with the addition of  $\text{In}^{3+}$  (0 - 1 equiv.) in DMF- $\text{H}_2\text{O}$  (9 : 1, Tris 0.01 M, pH =7.4).

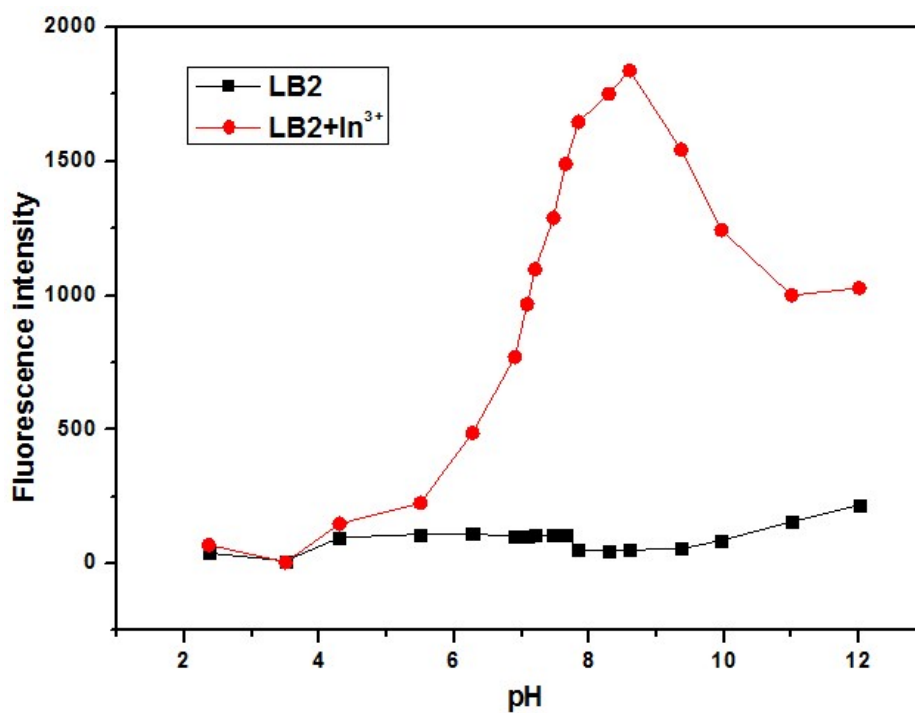

Fig.S9 Fluorescence intensity of **LB2** and **LB2** in the presence of  $\text{In}^{3+}$  at various pH values in DMF- $\text{H}_2\text{O}$  (9 : 1, v/v) 10 mM of Tris buffer solution.



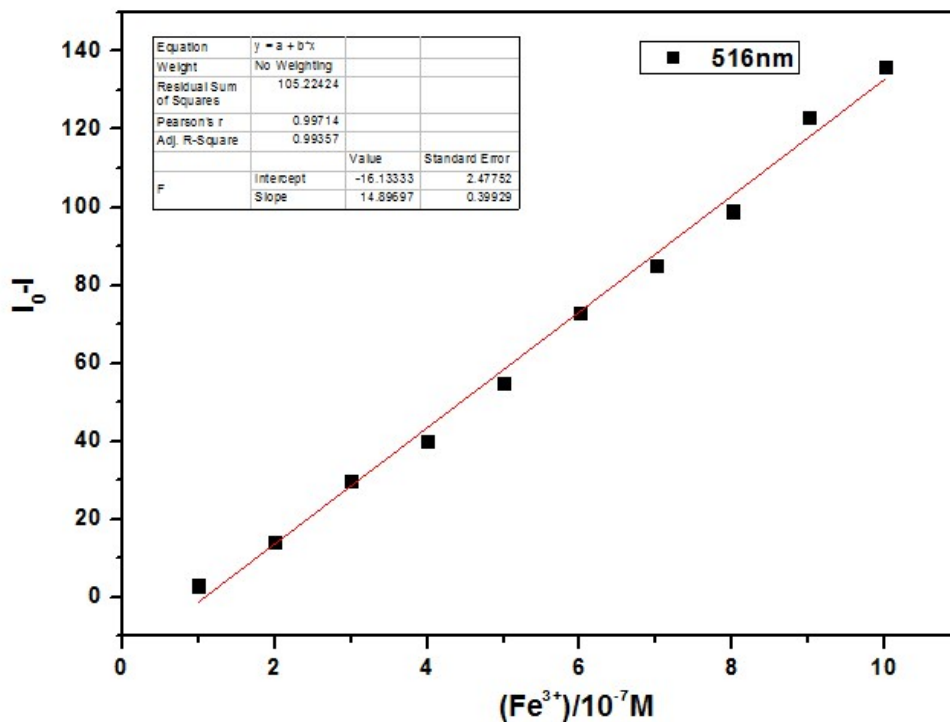

Fig.S10 Fluorescence intensity of [LB2+In<sup>3+</sup>] at 516 nm with the addition of Fe<sup>3+</sup> (0 - 1 equiv.) in DMF-H<sub>2</sub>O (9 : 1, Tris 0.01 M, pH =7.4).

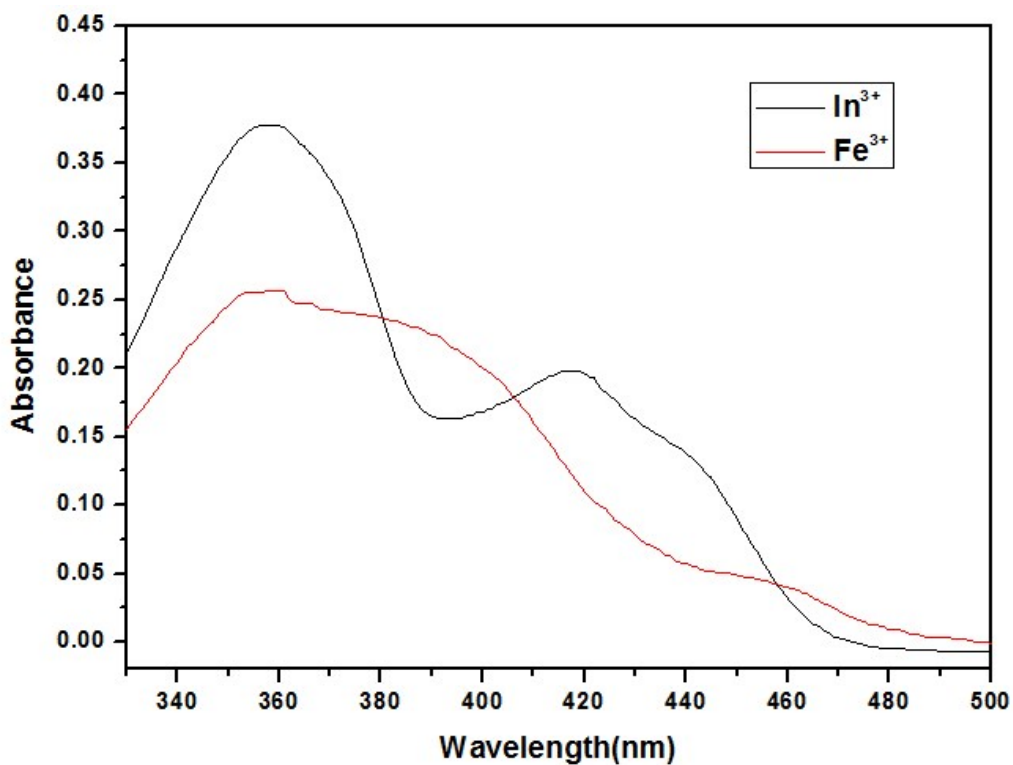

Fig.S11 Absorption spectra of [LB2+In<sup>3+</sup>] and [LB2+Fe<sup>3+</sup>] in DMF-H<sub>2</sub>O buffer solution (v/v = 9:1, Tris = 10 mM, pH = 7.4).

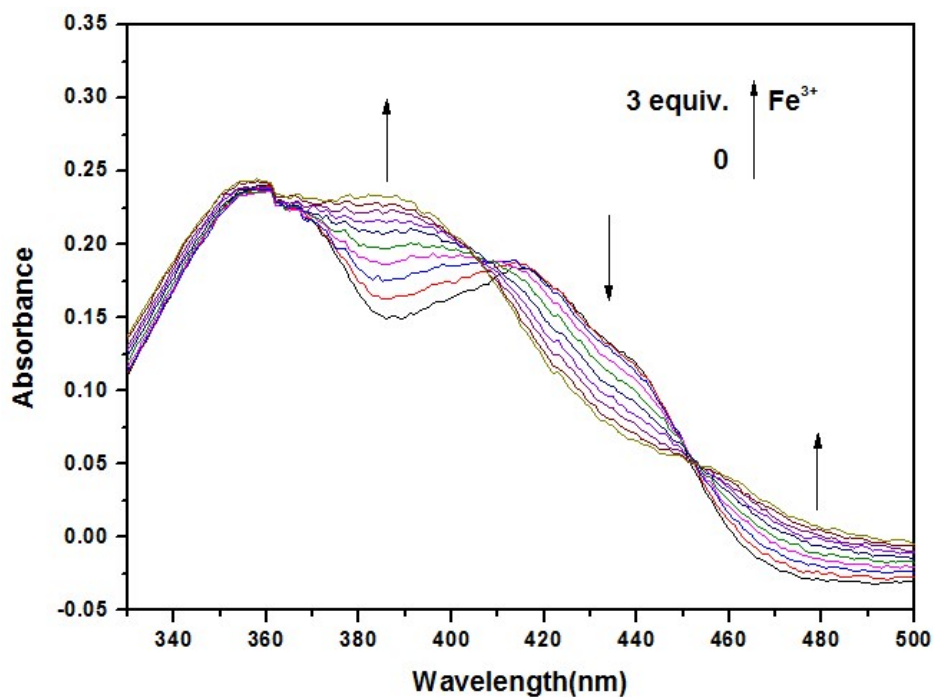

Fig.S12 Changes in absorption spectroscopy of [LB2+In<sup>3+</sup>] (30 μM) with incremental addition of In<sup>3+</sup> (0–30 μM) in DMF–H<sub>2</sub>O (9 : 1, v/v) 10 mM of Tris buffer solution at pH 7.4.

|               |               |             |        |                 |              |                        |                       |
|---------------|---------------|-------------|--------|-----------------|--------------|------------------------|-----------------------|
| Sample Name   | 200710-LB-6   | Position    | P1-B6  | Instrument Name | Instrument 1 | User Name              |                       |
| Inj Vol       | -1            | InjPosition |        | SampleType      | Sample       | IRM Calibration Status | Success               |
| Data Filename | 200710-LB-6.d | ACQ Method  | 0103.m | Comment         |              | Acquired Time          | 7/10/2020 12:06:46 PM |

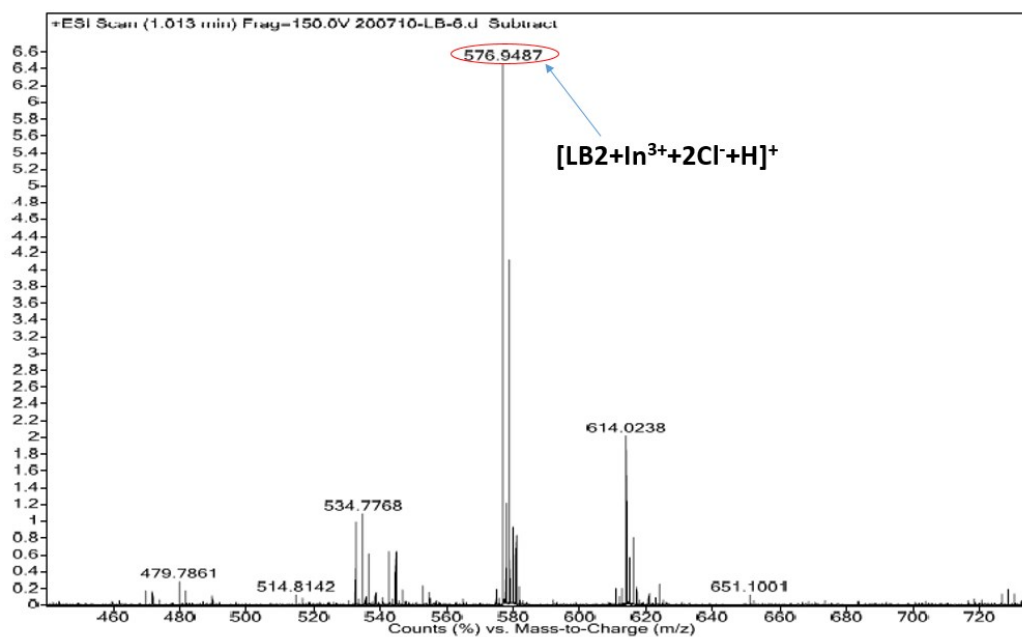

Fig.S13 ESI mass spectrum of complex [LB2+In<sup>3+</sup>].

|               |               |             |        |                 |              |                        |                       |
|---------------|---------------|-------------|--------|-----------------|--------------|------------------------|-----------------------|
| Sample Name   | 200710-LB-7   | Position    | P1-05  | Instrument Name | Instrument 1 | User Name              |                       |
| Inj Vol       | -1            | InjPosition |        | SampleType      | Sample       | IRM Calibration Status | Success               |
| Data Filename | 200710-LB-7.d | ACQ Method  | 0103.m | Comment         |              | Acquired Time          | 7/10/2020 11:47:42 AM |

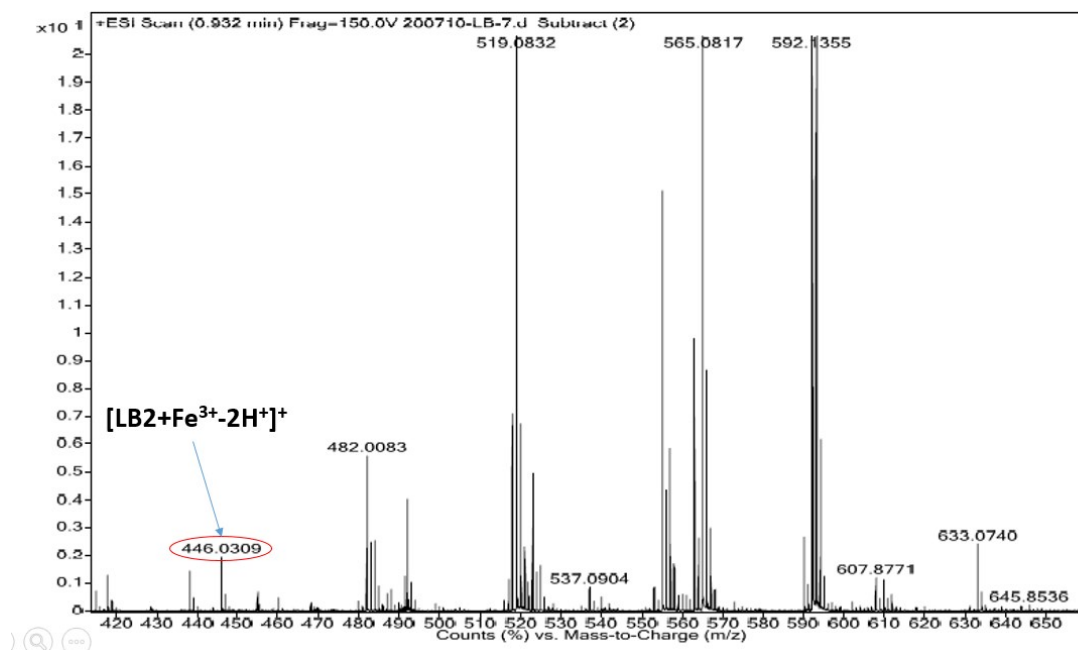

Fig.S14 ESI mass spectrum of complex  $[\text{LB2}+\text{Fe}^{3+}]$ .

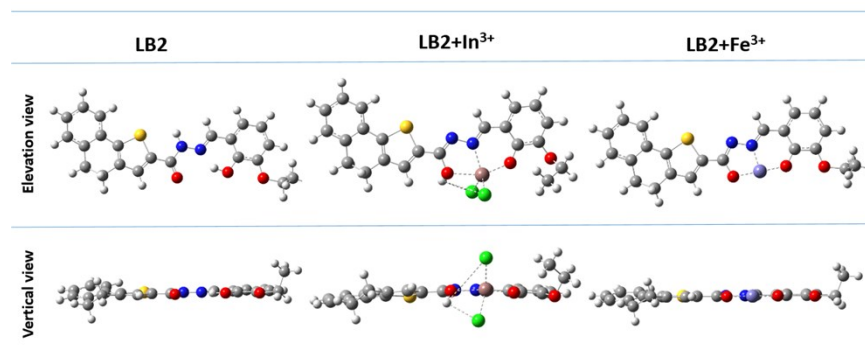

Fig.S15 The optimized geometry of  $\text{LB2}$ ,  $[\text{LB2}+\text{In}^{3+}]$  and  $[\text{LB2}+\text{Fe}^{3+}]$  at the B3LYP level of theory, where light-gray, red, blue, white, purple-gray, grayish-blue and green spheres denote C, O, N, H, In, Fe and Cl atoms, respectively.

Table S1 Determination of the  $\text{In}^{3+}$  concentration in tap water samples

| sample | $\text{In}^{3+}$ added<br>(mol L <sup>-1</sup> ) | $\text{In}^{3+}$ recovered<br>(mol L <sup>-1</sup> ) | Recovery<br>(%) | RSD<br>(%) |
|--------|--------------------------------------------------|------------------------------------------------------|-----------------|------------|
| 1      | $3 \times 10^{-5}$                               | $3.2 \times 10^{-5}$                                 | 107.6           | 0.61       |
| 2      | $4 \times 10^{-5}$                               | $4.2 \times 10^{-5}$                                 | 106.5           | 0.86       |
| 3      | $5 \times 10^{-5}$                               | $5.3 \times 10^{-5}$                                 | 105.4           | 0.97       |

Table S2 Determination of the  $\text{Fe}^{3+}$  concentration in tap water samples

| sample | $\text{Fe}^{3+}$ added<br>(mol L <sup>-1</sup> ) | $\text{Fe}^{3+}$ recovered<br>(mol L <sup>-1</sup> ) | Recovery<br>(%) | RSD<br>(%) |
|--------|--------------------------------------------------|------------------------------------------------------|-----------------|------------|
|--------|--------------------------------------------------|------------------------------------------------------|-----------------|------------|

|   |                    |                      |       |      |
|---|--------------------|----------------------|-------|------|
| 1 | $1 \times 10^{-5}$ | $1.1 \times 10^{-5}$ | 113.1 | 2.08 |
| 2 | $2 \times 10^{-5}$ | $2.2 \times 10^{-5}$ | 110.2 | 2.43 |
| 3 | $4 \times 10^{-5}$ | $3.8 \times 10^{-5}$ | 95.3  | 2.29 |

Table S3 Determination of the In<sup>3+</sup> concentration in drink water samples

| sample | In <sup>3+</sup> added<br>(mol L <sup>-1</sup> ) | In <sup>3+</sup> recovered<br>(mol L <sup>-1</sup> ) | Recovery<br>(%) | RSD<br>(%) |
|--------|--------------------------------------------------|------------------------------------------------------|-----------------|------------|
| 1      | $2 \times 10^{-5}$                               | $1.9 \times 10^{-5}$                                 | 96.8            | 1.34       |
| 2      | $3 \times 10^{-5}$                               | $3.1 \times 10^{-5}$                                 | 104.5           | 0.63       |
| 3      | $5 \times 10^{-5}$                               | $5.2 \times 10^{-5}$                                 | 104.7           | 1.52       |

Table S4 Determination of the Fe<sup>3+</sup> concentration in drink water samples

| sample | Fe <sup>3+</sup> added<br>(mol L <sup>-1</sup> ) | Fe <sup>3+</sup> recovered<br>(mol L <sup>-1</sup> ) | Recovery<br>(%) | RSD<br>(%) |
|--------|--------------------------------------------------|------------------------------------------------------|-----------------|------------|
| 1      | $1 \times 10^{-5}$                               | $1.0 \times 10^{-5}$                                 | 109.3           | 1.38       |
| 2      | $2 \times 10^{-5}$                               | $2.2 \times 10^{-5}$                                 | 111.8           | 1.69       |
| 3      | $3 \times 10^{-5}$                               | $2.8 \times 10^{-5}$                                 | 94.6            | 1.21       |

Table S5 Comparison of type of indium sensors and their detection limits

| Solvent system                | Detection limit         | Response | Reference |
|-------------------------------|-------------------------|----------|-----------|
| DMF                           | $5.3 \times 10^{-7}$ M  | -        | 2         |
| CH <sub>3</sub> CN            | $6.4 \times 10^{-8}$ M  | -        | 13        |
| Ethanol                       | $6.1 \times 10^{-7}$ M  | turn-on  | 19        |
| Methanol                      | $2 \times 10^{-6}$ M    | turn-on  | 28        |
| DMF/H <sub>2</sub> O(v/v,9:1) | $8.05 \times 10^{-9}$ M | off-on   | this work |

Table S6 Comparison of type of ferric ion sensors and their detection limits

| Solvent system                 | Detection limit         | Response | Reference |
|--------------------------------|-------------------------|----------|-----------|
| DMF                            | $4.4 \times 10^{-7}$ M  | -        | 2         |
| DMSO/H <sub>2</sub> O(v/v,9:1) | $6.7 \times 10^{-8}$ M  | off-on   | 30        |
| Pure aqueous                   | $2.49 \times 10^{-7}$ M | on-off   | 33        |
| THF/H <sub>2</sub> O(40:60)    | $2.95 \times 10^{-6}$ M | turn-on  | 34        |
| DMF/H <sub>2</sub> O(v/v,9:1)  | $2.59 \times 10^{-8}$ M | on-off   | this work |
